# Supplementary material for: DNA secondary structures are associated with recombination in major Plasmodium falciparum variable surface antigen gene families
Source: PubMed Central journal article supplement (PMC3936766; doi:10.1093/nar/gkt1174), 2013-11-16
Supplement: supp_gkt1174_Supplementary_Material.pdf [file supp_gkt1174_Supplementary_Material.pdf]

# Supplementary material

- **Supplementary table 1 | Primers designed in this study**
- **Supplementary figure 1 | Parent and progeny karyotype and chromosomal positions of *var* gene repertoires of the parental and seven progeny clones**
- **Supplementary figure 2 | Alignments of donor and chimer DNA sequence regions containing recombination sites**
- **Supplementary figure 3 | Density distribution of 50-mer DNA folding free energies in *P. falciparum* real and shuffled *var* genes**
- **Supplementary figure 4 | Examples of *var* 50-mer DNA secondary structures**
- **Supplementary figure 5 | Location of low folding free energy DNA 50-mers in *P. falciparum* *var* genes**
- **Supplementary figure 6 | Relative location of predicted DNA secondary structures in *var* gene domains CIDR and NTS**
- **Supplementary data file 1 | Fasta file containing chimeric *var* DNA sequences**

# Supplementary table 1

Supplementary table 1. Primers designed in this study

| D) Quantitative real-time PCR primer pairs for chromosome mapping of var genes |             |                                |                            |
|--------------------------------------------------------------------------------|-------------|--------------------------------|----------------------------|
| Chromosome                                                                     | Gene name   | Forward primer                 | Reverse primer             |
| Chr.1                                                                          | FA0590w     | CAGTGGGTATGGTGAATGTA           | CCTGATGAAGAAGGAGGATGC      |
| Chr.2                                                                          | FFB0490c    | TCAAGCCOCCGCGA CGAT GT         | CCAAAACCTCCAGTTGCTCC       |
| Chr.3                                                                          | PF02615w    | GAACAACCTTCAAGGCA TCAAG CG     | GTITTAATTCITTTTGAACAACA CG |
| Chr.4                                                                          | FFE1640w    | AATACGACGCGTGGTCTT             | CTCTGATACCTGCTGCTT         |
| Chr.5                                                                          | FFE0330w    | AATACGACGCGA GCA TAA TCC       | TCCTTATCTCTTATGATTC        |
| Chr.6                                                                          | FF0565c     | ACTCCAGAA TTTGAAAGTCCTTG       | GTCTTGGGAAGCA TTTGGACCC    |
| Chr.7                                                                          | PF07_0073   | AAATGACAGGCTCATCTGGTGT         | TTGSSGCA CATCTTCCATCA      |
| Chr.8                                                                          | PF08_0118   | GAACAACAAAGCA TCGA CGAC        | GGCATTAATTTGATGTC TCCGCG   |
| Chr.9                                                                          | FF1590w     | AACAGACGACCA TTA TTA TCG       | TTGCTATTTTGGTATATCTCCCG    |
| Chr.10                                                                         | FF10_0027   | ACTCAGGCA TTA TTA TCG          | TTGGTGCCTTTTATCTCT         |
| Chr.11                                                                         | FF11_0481   | AGCCCGA TGGCGGTGATGGTGT        | CTGTGCA TAAACGAGCAAAAACCA  |
| Chr.12                                                                         | FFL1510c    | TGCGCAATGCTTTTGGTGTCTG         | ACATGATAAAAA TGA TCTCTCC   |
| Chr.13                                                                         | MAL13P1_151 | AA TGGCGTGTGATGTCCTT           | ACGATGCACTTGGTCTT          |
| Chr.14                                                                         | FF14_0425   | TGTA CCAACA GCGCTACCGA         | CTTCTGGCA TGTGTCATAT       |
|                                                                                | FFA0005w    | CTCGTGTGATGATGCTGAGG           | CCAGTAA TCGCTCAAAA TGTAT   |
|                                                                                | FFD1005c    | CCATCA CGAAGA ACAA GAGCG       | TGGGTGATGCTCTTGAAGC        |
|                                                                                | PF01245c    | GGAT TGACTA TAA GGA TCGA AAGAC | GTGCGACTGTTCTCCACTGACA     |
|                                                                                | PF07_0048   | CGGA AACA CTA GCGA CCGATG      | ACGATGCACTGCGGCA ACGCG     |
|                                                                                | H3var2cSaB  | AGTCAAGCACTATGTGATCA           | TTCCATGAGTGAATTTGCTG       |

| D) Quantitative real-time PCR primer pairs for var exon 1 extremities |                    |                                |                                |                                       |                                     |
|-----------------------------------------------------------------------|--------------------|--------------------------------|--------------------------------|---------------------------------------|-------------------------------------|
| Gene                                                                  | Gene name          | 5-end primer pairs             | 3-end primer pairs             |                                       |                                     |
| Qlone:                                                                | Gene name          | Forward primer                 | Reverse primer                 | Forward primer                        | Reverse primer                      |
| 3D7                                                                   | PF10_0408          | GTCCACCAAA GAAAGCACTCA         | A CCA AAA CTCTCTGCCCA TT       | GAT TGA TCGAT A TCCCTTGAA G           | TTGTCCTCTCTGCTTCCAC                 |
| 3D7                                                                   | FFL0200w           | TGCA TTA TGTGCGCGATGAT         | TTCCGCTA GCA TGTGA TCCA        | CATCGGCTCA GATCA CACTC                | CAGATATGCGAT TGAACGGTT              |
| 3D7                                                                   | MAL13P1_356        | COGAA TAT TGTCCCTTCA CA        | CATTTGCCCA CCA A GTGTA TC      | ACCAA CA TAGCGCA A TCCAC              | GTGGGCA TCTCCCA GAA TCTTC           |
| 3D7                                                                   | PF01235w           | AAACA GCGT TGA TGGCGCA TA      | GA CGCGCA GGA GGTAAA TAG       | ATCGA GGGGGGA GGTAAA AAC              | ATCGA GTTCCGA CGGAT TTCC            |
| 3D7                                                                   | PF01245c           | AAAGAA GCGTCA CA TCC           | CGTCTGCTGCTGCTGCTGCTG          | TTCTGCTTTCA GCGA GGA C                | ATCGA CA TAA CA TAGGCTG             |
| 3D7                                                                   | PF08_0142          | CTGTGTGGA AAA CGAA AAGT        | TAT TCA TCCAGGGCCAAA AG        | AAAGTGGGAAA ACAA CGCAT                | AAAA CACTA TCGA AGTTA AGC           |
| 3D7                                                                   | PF08_0107          | CCTGAAA AAGGA CGGA GCGT        | CGA GGA CA CTA CCA CCA GT      | CCAGTGA GGA CCA AAA AAG C             | AGTGA AACA GCGA AAA A C             |
| 3D7                                                                   | PF08_0140          | TCA TTA TGGGAAA GCA CGAT       | TGAA TTTCTCA CTA TCGGAA CT     | TGGAA CTA TCA TCGGAAA AAT C           | CAAAA TAT TCCCTCTGGTATCC            |
| 3D7                                                                   | PF08_0140          | AT TGGTGGCA AACTTGTGAT         | TTCAA TGGTCTCTGTA CA           | ACA ACGA GAA ACAA CCGAAA C            | TTCTCCGCA CATCTCTGTCT               |
| 3D7                                                                   | FFA0005w           | CTCGTGTGATGATGCTGAGG           | CGA CCGTAA TCGCTGAT TGGT       | AAC TCA GGA A GCGA GAA GAAC           | GTGTGTGTTTGGTGGTGGTCCA              |
| 3D7                                                                   | MAL7P1_212         | CTCGTGTGTTGGGGATGACTAC         | GATCTGTGTGCA CCA C GTCCCTG     | GTA TGA C TCGT GAA AAA AAGTCCG        | CTTTTTTCTTCA CCA CCGAC              |
| 3D7                                                                   | PF02625c           | CTA CGAAA AAGTCTTCTGGTGG       | GGTCTCA C TCTCTTTCTGGTGG       | CGTA CAA CA GAA CCA A AAG GG          | AGTGA AACA GCGA AAA A C             |
| 3D7                                                                   | FF11_0008          | GGGTCA CAA CA TCA AAA ATTTTC   | TTCCGA TCTCTGAAA TTTCCG        | GA CGGCTCA CCA CA GAA GAA             | CGTCA TCA TGGTGTGGTT                |
| 3D7                                                                   | FF11_0008          | CGTGGTGTGAT TGA CGA TCA CCG    | CGTGGTGTGAT TGA CGA TCA CCG    | CGTGGTGTGAT TGA CGA TCA CCG           | AGGTTA TTTGTTGTA TGGT               |
| 3D7                                                                   | FF00100w           | CGCAAG TCTCTCA A CAG A GT      | CGGCAAAA TGA TCGCTCTTC         | ACTAA TGGCGCTGAAA AAGT                | CGAA CCA A GCGA AAA A C             |
| 3D7                                                                   | MAL7P1_55          | GTGACGCTCTGAT TACTAA AC        | CATTTTGA GCA TCTACTATGATC      | GATCA CCGTCA CCA CCA TCT              | GTGGGA TGGGTATTA AAGT               |
| 3D7                                                                   | MAL7P1_55          | CGCA CA GGA GTG AAGTGGTCTG     | GTITGTGAG CCGCTGCTGTC          | TAGA TGA CA CCGTCTGCAA                | AA TAAA AAGCGCA A TGAAGTC           |
| 3D7                                                                   | MAL7P1_58          | TGCTGA TGGTACTG TAAA AAA TA    | TTTA TTA TGGTCA TCTCTGTC       | TCTGTGAA GAA A CCGCA CA               | TAAA AAGCGCA A TGAAGTC              |
| 3D7                                                                   | PF07_0048          | CGGATGCA CTA GCGA CCGATG       | CGA CCGTAA TCGCTGAT TGGT       | TTCTGTTGTTTCCCA A GGGT                | GTGTGTGTTTCCCA A GGGT               |
| 3D7                                                                   | PF07_0050          | GA TCTGGA GGGAAA AAT TTA G     | CATCTTCTCA CTA CCGTCTG         | CGGCA AAA C TCGTCA C TCA C            | GA CAA A A C TCGTCA C TCA C         |
| 3D7                                                                   | PF07_0051          | CA CCGA TAA CCA TCGAA TTTGAT   | GGCCCAAAA TCC TTA TAA TCG      | GAA CA GAA GAAAA A CCA GAGG           | GGGTTTTCTTGGTGGTCTTC                |
| 3D7                                                                   | MAL7P1_187         | TTTGGCA TAT ACTGCTGCA TC       | GCTCTCTCA CTA TACTCA ATTC      | TGGA CGA GAA TAA A TGGGAA GT          | TTTGGTGGGA GGGG GT                  |
| 3D7                                                                   | PF08_0103          | CGGCTCA GGA GCGTGTATC          | GAA GAA TGA TGA TTTGGTGGG      | GTGCA TTA TGA GAT TGA GATG            | GGTGGTTTA CCA TCA TCTGTAT           |
| 3D7                                                                   | PF08_0108          | GTAA CCGTGT TTA CCGA CAGAC     | GA CCGTGT TTA CCGA CAGAC       | TTCTGCGA GAA GCA TGA C                | CGAA CCA A GCGA AAA A C             |
| 3D7                                                                   | PF11_0007          | CGTGGCA GT TTA TGA AGCTTTCAC   | TAAT TGGGAAA GCA GCA TCA TCC   | AATGGA TGA CCA GCAA AACCA             | TTCTGGTGA CAA TGGTGTGGT             |
| 3D7                                                                   | FF11_0521          | CGGA TCGCA A TCA CCA GCGACTC   | CCTA TAA TCA GAA TCA CCA GGGCT | GATCA GA GAA A TGGCGGCT               | TTCTGGTGA CAA TGGTGTGGT             |
| 3D7                                                                   | MAL13P1_1          | C TAA CAT TGGGCGCA C GAA GCGAC | GTGAGGTTGAT TACTGCTCA TGGT     | ACA AAGGA A GCTGCA TCTCC              | GGCAA TACTCCCA C TGA TGG            |
| 3D7                                                                   | PF11_0521          | AA TGA GAA TGA GCA TGA TGA GCG | AA TGA GAA CTTTAA TCGCTGAT     | TTCTGCGA GAA GCA TGA C                | CGAA CCA A GCGA AAA A C             |
| 3D7                                                                   | FFA0785c           | AA TGA TAA AAG TCCAAA AATGCG   | ACTTCTCA C GAT TCGCTCTAC       | ATGA C TGTG TGA CAA CAG               | CGAA TGA A GCGA AAA A C             |
| 3D7                                                                   | FFB0010w           | TA TGGTGGGGGA TA GTTCA C       | A TACTCTTGA CCAA AACA CCG      | GATGTA TCA A C TGGGTA A G             | CCACA CA TCGA TA TGA                |
| 3D7                                                                   | PF00005w           | GGAAA AATG TCA CGA AAA AAGC    | TA T TCCCTGCTGTTTGTGGC         | GAA GA TAGTGA TCGGAGGA                | AA TAAA AAGCGCA A TGAAGTC           |
| 3D7                                                                   | PF01220c           | CGGMAA A GAA C TCGTCA TTAGT    | TTGCTCGCA C GGA TCA AAT TGG    | GA AAA GGGTGA A GGA TCA C             | AA CCA A GCGTGA A AAGGGT            |
| 3D7                                                                   | PF00005w           | CTGGA TCGA GCA GGA GCGA CCGG   | TA TGGT TAA TTA TTTGGTCTG      | GA A A A CCGC CCGTCA CAG              | GAT CCGGCTA CTTTCA                  |
| 3D7                                                                   | PF02002c           | GA GCGGA TTTA TCA G A GCGA C   | CGATGA CCGCTTA TTTA CCA TGT    | AAA A GAG TCGCTCTCA C                 | TTTCTCA AAA A TAAA A GCGCA          |
| 3D7                                                                   | PF02005c           | GTGGTGA TGGTGGTGTACTGCTG       | GCA TCGA CTTAA TGA C TGTG C    | CGA C TGGGCTG TGA A TAG               | TTTCTT TGA GAA A G T A C TCA C      |
| 3D7                                                                   | PF02005w/MAL13P1_1 | GGTAT TACTGCTG CCGA GGG        | CCCGA TTTGGT TCGCA CCA AG      | ACTGA TAA GCGA AAGCGTGG               | CAGGGGTGAT TCTTCA GAC               |
| 3D7                                                                   | PF02005w           | CAATTTCA GGTGAT TGA C          | CGCTTGGT TCGCA CCA AG          | CGA TAA A GCGC CCA A A G C            | ACTCGA C ATG TGGTGA A G C           |
| 3D7                                                                   | FF11530c           | ACGGA TAA GTA TAA AAT TCCCAAG  | AGGCTGTA A C TTTTCCCTCG        | GA C C TGGCTGCTGAA GAC                | AA A CCGTGA C TCA C TCTC            |
| 3D7                                                                   | FFL0030c           | GTA TAA TCA GAT TGTCA A C      | CATA GGA GGTGTAT TCTA          | GATGA TCTTGA C TGA ATG                | TTCA C TCA GAA A TCGCGAG            |
| 3D7                                                                   | FFL0935c           | CAAAA GGT TAA GTGAAA AATGGT    | GA GCGGCA A CCA CCA AATG       | GGGA GCGA ACAA AATATAG                | AGCA CCA C TCA CAA ACG              |
| 3D7                                                                   | FFL1960w           | GGAA C A GGA A A GAA A GCGTTC  | A TCA CTTAA TTT TTTTCTTCA C    | CAA TA STGA CACA CAGCA                | GTCCA GSTA TGA C TGTAG C            |
| 3D7                                                                   | PF01245c           | CGTGTGCA GAT TGA TGA AAG       | CGTGTGCA GAT TGA TGA AAG       | TAA AAA CCGC CCGTCA CAG               | ATGA TCGTCA TCGTAA CCG              |
| 3D7                                                                   | PF10_0001          | AGG TAA A GGA GGT A AAGCTG     | CGTGTGCA GAT TGA TGA AAG       | TTG TAA A CCGA CAGCA GCA CCA          | ATCGCA GCGCA TACTCTAA G             |
| 3D7                                                                   | PF07_0049          | TAT TATGGTGA TCTCTGCTTGG       | TCTA TAT TGGGGA CAGGCTC        | GA GGGAA C GAG TGA CAA GTG            | TTTGGTGTGTTGTTGACT                  |
| 3D7                                                                   | PF08_0141          | AACTGCTGGA TCA GCGGAT          | CGA AACA TATTGGCTGCTC          | CCTGAT TCCCAA TTTCTCT                 | TTTCTT TGA AAA AAG ACGCT            |
| 3D7                                                                   | MAL13P1_220        | GTCTCTCA TGGTGA TGA AAA GAA    | AGTACGGT TACTCTGTTA TGG        | CAAA A GCA TCGTGTGA A GATC            | CTTCTCTT TGA CAA GGGTGTG            |
| 3D7                                                                   | PF02005w           | CGTGTGCA GAT TGA TGA AAG       | CGTGTGCA GAT TGA TGA AAG       | CGCTGCA GAA A CTTTCA C                | A TCTTTT TCGCA T TGA C TTTCT        |
| H3B                                                                   | H3Bvar16           | CGTGTGCA GAT TGA TGA AAG       | CGTGTGCA GAT TGA TGA AAG       | GA A TAA A TGA TGT TGA TGG            | A TCTTT TCGCA T TGA C TTTCT         |
| H3B                                                                   | H3Bvar18           | CGTGTGCA GAT TGA TGA AAG       | CGTGTGCA GAT TGA TGA AAG       | TGACTTCA TGA A C A C TCTCTCA          | CGAAA A C A C TGA C A A A G         |
| H3B                                                                   | H3Bvar2cSaB        | CGTGTGCA GAT TGA TGA AAG       | CGTGTGCA GAT TGA TGA AAG       | CCTA TGA A C TCTGGA GAA A C           | GGAA C GGA A A GGA TGA A C T        |
| H3B                                                                   | H3Bvar18           | CGTGTGCA GAT TGA TGA AAG       | CGTGTGCA GAT TGA TGA AAG       | CAT TAT TGTAA CCA C TCTGAC            | GA TGGTAA G A G A C TCTGAC          |
| H3B                                                                   | H3Bvar22           | CGTGTGCA GAT TGA TGA AAG       | CGTGTGCA GAT TGA TGA AAG       | CGAA A G TGTGAA A TGA C A G           | GCTCA CTA C A C TGTG A A C          |
| H3B                                                                   | H3Bvar29           | CGTGTGCA GAT TGA TGA AAG       | CGTGTGCA GAT TGA TGA AAG       | CA TTTTGA TTA G TACTA C T A C         | TTTCTGTAT CA CCGT TGA               |
| H3B                                                                   | H3Bvar13           | CGTGTGCA GAT TGA TGA AAG       | CGTGTGCA GAT TGA TGA AAG       | GAA T TCTGCT TGGTAAA TCC              | CGCTA TAA A C T T A A C GCGS        |
| H3B                                                                   | H3Bvar13a          | CGTGTGCA GAT TGA TGA AAG       | CGTGTGCA GAT TGA TGA AAG       | CA CCA C C T T A T A C G C C A C      | TTTA CCA C A T T T T A C C T T A C  |
| H3B                                                                   | H3Bvar17           | CGTGTGCA GAT TGA TGA AAG       | CGTGTGCA GAT TGA TGA AAG       | TC A T T T G T T T C T G A T C T      | GT T T G A C T G T T G C C A C T    |
| H3B                                                                   | H3Bvar26           | CGTGTGCA GAT TGA TGA AAG       | CGTGTGCA GAT TGA TGA AAG       | CTGCA G T C C T G A A C T G A A       | TTG T T G G A T T G G G G T         |
| H3B                                                                   | H3Bvar19           | CGTGTGCA GAT TGA TGA AAG       | CGTGTGCA GAT TGA TGA AAG       | CGA A C C A C T G G A A C A A A C     | TTG T T G G A T T G G G G T         |
| H3B                                                                   | H3Bvar18           | CGTGTGCA GAT TGA TGA AAG       | CGTGTGCA GAT TGA TGA AAG       | AGCTGCA GAA TCCCTGATAAA               | TTG T T G G A T T G G G G T         |
| H3B                                                                   | H3Bvar10           | CGTGTGCA GAT TGA TGA AAG       | CGTGTGCA GAT TGA TGA AAG       | TTGGA TGA A A T GCGTAA A G A G        | AGG T T A A G G G T T G T G A T G   |
| H3B                                                                   | H3Bvar11           | CGTGTGCA GAT TGA TGA AAG       | CGTGTGCA GAT TGA TGA AAG       | CGA CCA C C T T A T A C G C C A C     | TTTA CCA C A T T T T A C C T T A C  |
| H3B                                                                   | H3Bvar21           | CGTGTGCA GAT TGA TGA AAG       | CGTGTGCA GAT TGA TGA AAG       | AG A TGA TGTGAAA A G T C A A A G      | GT T T G A C T G T T G C C A C T    |
| H3B                                                                   | H3Bvar35           | CGTGTGCA GAT TGA TGA AAG       | CGTGTGCA GAT TGA TGA AAG       | CA G A A C C A C T G G S G A C C      | TTG T T G G A T T G G G G T         |
| H3B                                                                   | H3Bvar2cSa A       | CGTGTGCA GAT TGA TGA AAG       | CGTGTGCA GAT TGA TGA AAG       | AAA C G C G T G G A G G A G A C       | CG T G G G T A C T C T G G T        |
| H3B                                                                   | H3Bvar31           | CGTGTGCA GAT TGA TGA AAG       | CGTGTGCA GAT TGA TGA AAG       | AAA C G C G T G G A G G A G A C       | AAA C C C C A G A C T A C A G       |
| H3B                                                                   | H3Bvar11           | CGTGTGCA GAT TGA TGA AAG       | CGTGTGCA GAT TGA TGA AAG       | ACA T C T G G T T A T G T T G T G     | GG C T T A A A C T T A T T C T G C  |
| H3B                                                                   | H3Bvar25           | CGTGTGCA GAT TGA TGA AAG       | CGTGTGCA GAT TGA TGA AAG       | CGA A A T G T G A T G T G A T T C     | TCA T G A C T G C T C T A C C G T   |
| H3B                                                                   | H3Bvar34           | CGTGTGCA GAT TGA TGA AAG       | CGTGTGCA GAT TGA TGA AAG       | GA A C C A C G T T A T A T G A T T    | T G A T T G G A A A G A G C         |
| H3B                                                                   | H3Bvar01           | CGTGTGCA GAT TGA TGA AAG       | CGTGTGCA GAT TGA TGA AAG       | AAA A G G G G A T T G A A T G A A A   | CG G T T G C A C T C T C A A C      |
| H3B                                                                   | H3Bvar27           | CGTGTGCA GAT TGA TGA AAG       | CGTGTGCA GAT TGA TGA AAG       | C T T A C T G A T G A A C A C C G     | T T C C T A C T G G T G G T G T G   |
| H3B                                                                   | H3Bvar02           | CGTGTGCA GAT TGA TGA AAG       | CGTGTGCA GAT TGA TGA AAG       | T T T T A T T G C T C A T G A A G G   | CG C C T G C A C A C T C T C T C    |
| H3B                                                                   | H3Bvar06           | CGTGTGCA GAT TGA TGA AAG       | CGTGTGCA GAT TGA TGA AAG       | T G T C T C A C A C A C A C A A G     | T G C C A C A C A A T C C A T C A C |
| H3B                                                                   | H3Bvar30           | CGTGTGCA GAT TGA TGA AAG       | CGTGTGCA GAT TGA TGA AAG       | C A C C A C A G A A C C G G A A A C   | T A G G A T G T A G T G S A A A G T |
| H3B                                                                   | H3Bvar12           | CGTGTGCA GAT TGA TGA AAG       | CGTGTGCA GAT TGA TGA AAG       | G G T G T A T G T A G G G A T G C     | T G A C C G G G A G A A G A T C C A |
| H3B                                                                   | H3Bvar03           | CGTGTGCA GAT TGA TGA AAG       | CGTGTGCA GAT TGA TGA AAG       | C C T C A G A A G G T A C T A A A C   | T G C T G C A G A T C T G A A T T   |
| H3B                                                                   | H3Bvar36           | CGTGTGCA GAT TGA TGA AAG       | CGTGTGCA GAT TGA TGA AAG       | AAA A G T T G T T T A T G A C T C A G | T T G A T G A C T G G G C A A A G G |

C) Full exon 1 var PCR primer pairs and application of amplified fragment

| Application | Gene name     | Forward primer                                      | Reverse primer                                          | Amplified from (genome): |
|-------------|---------------|-----------------------------------------------------|---------------------------------------------------------|--------------------------|
| Sequencing  | PF1_0008      | AATGATCA TTTGCA GCGTGGTCT                           | CACTG TGGCCCATCTTGGCATATC                               |                          |
| Sequencing  | PF08_0141     | TAA TGGTGTG TGGCGA CCGCT                            | GGGGGTGAGGTTTGGTCTGAC                                   |                          |
| Sequencing  | PF01640w      | ATCA TCA GAGGGGGCTAAAA TCC                          | CGTTGAACCTTAA CCGTGA A GATG                             |                          |
| Sequencing  | PF13_0003     | TAA CAGTGA GAGCCCAAAA CCGG                          | CGTGTCAAGGA TCAAGTGAATG                                 |                          |
| Sequencing  | PF01235w      | CAT TGA GGGGGGAGGGTAAA CCG                          | C T C T A T T T G A T T G A C T C T G G                 |                          |
| Sequencing  | PF02005w      | GTA GCGCA TTTA TCA G A CCGA C                       | G T T C T G C T G C T G T G T G C T G                   |                          |
| Sequencing  | PF11_0521     | GAA TCGA A TCA GCGA CCGTCCG                         | TTCTGTGCA C A A C T T T T G G G T                       |                          |
| Sequencing  | FF00100w      | TTTTGGGGGAAA CCGA GCGAC                             | CACCTGCA GTCGAA CAA TGGCA                               |                          |
| Sequencing  | FF1580c       | TA GCGTGGTGA TGA C GCTGATG                          | GAA ACAA A GGGGTTCTA C TCGA C                           |                          |
| Sequencing  | PF08_0140     | TTCCCTGCTTCCCTTCCCTC                                | GAA TAA TGGTGA GGGGGGGTGG                               |                          |
| Sequencing  | MAL7P1_187    | CTCGTGTGATGATGCTGAGG                                | CGTGTGCA GAT TGA TGA AAG                                |                          |
| Sequencing  | PF02005c      | G T C A G G T G G G A T G A C T G T G C             | T G C T A T T A C G T G C A C T G C                     |                          |
| Sequencing  | PF02015c      | CGCGGCAAA G T A TGGGGTATG                           | AA C A C T G A A A G T C A C A G G                      |                          |
| Sequencing  | FFL0030c      | CTTA CCGCA GAA A TGA AAGAG                          | G T T A C T T G A A A T T G A A C G                     |                          |
| Sequencing  | H3B var2cSa B | CAGTTTGGTGGGGA TGA C TCA CAG                        | T T C A C T T G A A A T G C C A C G                     |                          |
| Sequencing  | MAL7P1_212    | GCTCTGCGATGATGCTGGTGA                               | GTGCGGGGGTGA TGA CAGAT                                  |                          |
| Sequencing  | PF02005w      | CGCAA TTA TGGTGA GCA C GGA GGT A CCGG               | GTG TGGT TGGG T T G T G T T C C A                       |                          |
| Sequencing  | PF02005w      | G T A A G A C T G A C T A A A G A T G C A T C       | GGC CCG GCG G T G A T T G G G G T C T T C A T C         |                          |
| Sequencing  | PF13P1_356    | GCTCTAGA CAA GGA GGT A GCGGTGA TCCG                 | GGCGGGCGCA C T C T C T G T T G T T G T T C A G          |                          |
| Sequencing  | MAL7P1_55     | GCGA GGA GGT A GCGTGGTGG                            | TG T C A C T G T T G T C G C G G T T G C                |                          |
| Sequencing  | PF02005w      | G A C T C A A T T T C A G G T T A T G A C           | T G C G T T C T T G G C G C T T A T G                   |                          |
| Sequencing  | PF10_0408     | TGGA TCA CCA C T G C C A A C A C T G                | TTTGA TCA CCGGGCTGGTCTTC                                |                          |
| Sequencing  | PF08_0103     | GTGACGCTAGGA GGTGATCTG                              | TTTTGGTCTTGGTCCACTTTGG                                  |                          |
| Sequencing  | PF02020c      | GGA TCA GAT TAT TCGTCA CCA GGG                      | GGCTCGA A A C A A C T C T A C A A G                     |                          |
| Sequencing  | MAL7P1_50     | TGGA A A G T G T G A G A T G A C T G T C            | A G T T C T G T G C T T G C A C C A C T                 |                          |
| Sequencing  | MAL7P1_50     | G T A A A G C A A G A G T A A G A G T C             | G T T C T T G T G A A T T G T A A C G                   |                          |
| Sequencing  | FFL0935c      | A T G T T G C C A G C G C C A A G T C               | G T T C T T G T G A A T T G T A A C G                   |                          |
| Sequencing  | MAL13P1_1     | GGGAA T TCA C T A A C T G G A G G G A C A A G C A C | G T T C G C G C G C A C C T C T T T G C C T C A C T A G |                          |
| Sequencing  | PF08_0106     | AGTAA GGGTGA TTTGA CAG A G A G                      | C C A C A C T G A T T G T G G T A T C                   |                          |

# Supplementary figure 1

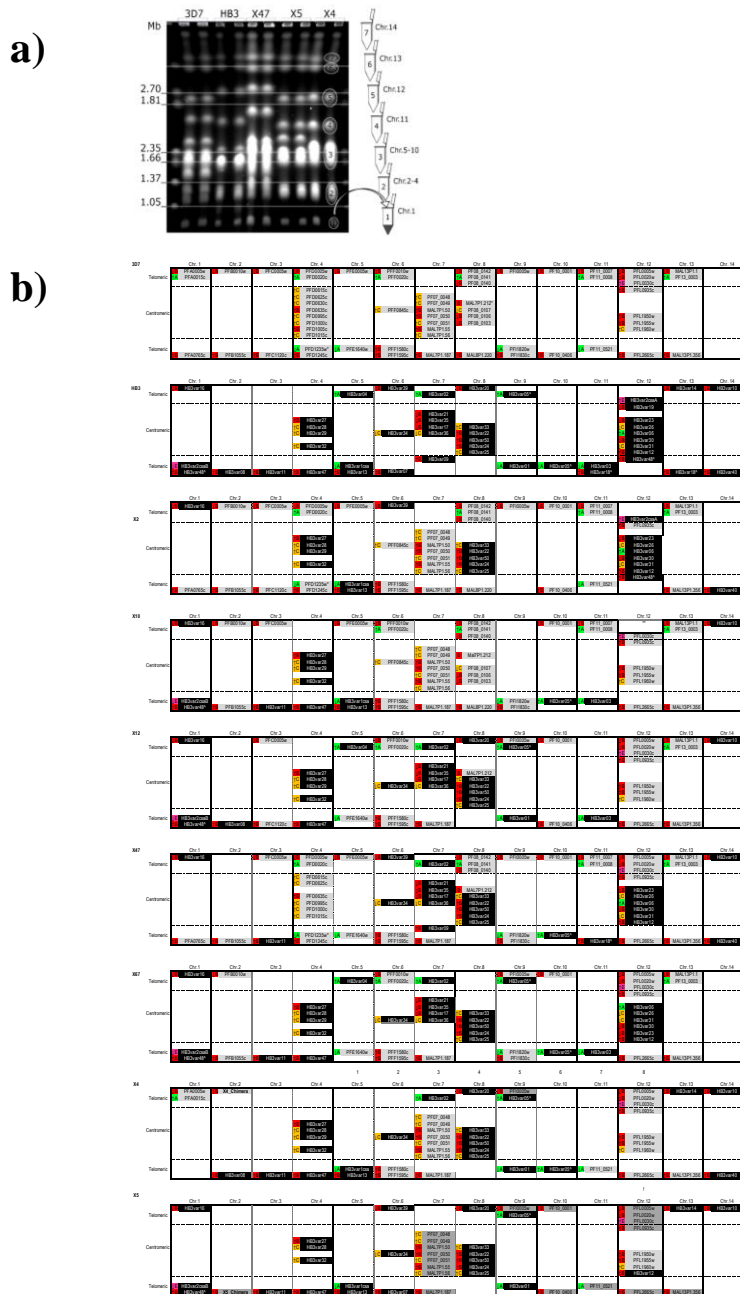

## Supplementary Figure 1 | Parent and progeny karyotype and chromosomal positions of *var* gene repertoires of the parental and seven progeny clones

**a)** Pulsed Field Gel Electrophoresis (PFGE) karyotypes of parent (3D7 & HB3) and three progeny clones (X47, X5 & X4). For illustration chromosome excisions used for X4 *var* mapping using QPCR are shown. **b)** Chromosomal positions of 3D7 (gray) and HB3 (black) *var* genes and their inheritance in seven progeny clones X4, X5, X2, X10, X12, X47 and X67. The chromosomal orientation (arrows) and *ups* promoter type (*upsA*: green; *upsB*: red; *upsC*: yellow) is shown for each gene. Solid black vertical lines indicate chromosomes within each PFGE separated chromosomal excision. Horizontal dashed lines delimit the centromere and telomere-proximal chromosome regions. Mapping estimates are based on QPCR data and chromosomal locations and orientations of specific genes and *ups*-types from 3D7 and HB3 genome assemblies (PlasmODB and Broad institute [6,12]). The analysis of the *var* gene segregation in progeny clones illustrates the plasticity of *P. falciparum*'s telomeric regions and that meiosis imposes a Mendelian inheritance of *var* repertoires.

# Supplementary figure 2

a

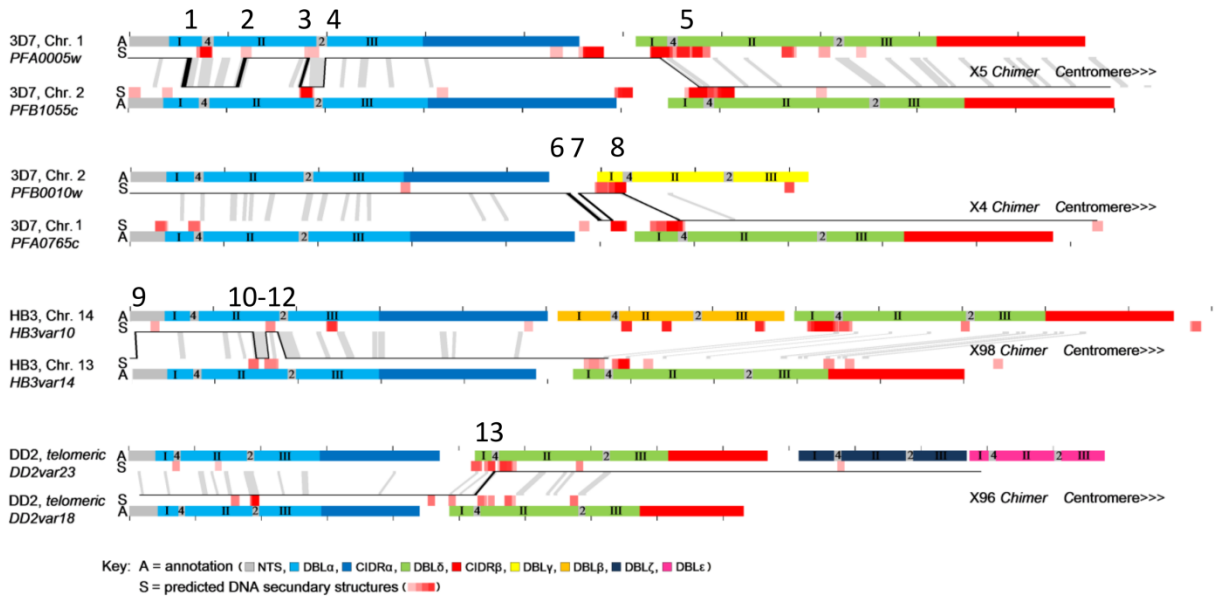

b

Recombination Site 1

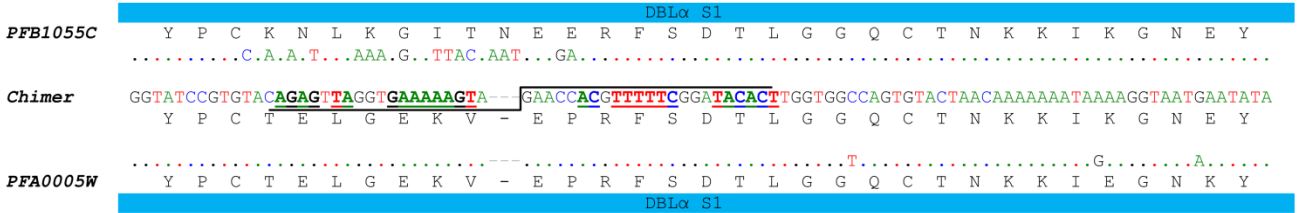

Recombination Site 2

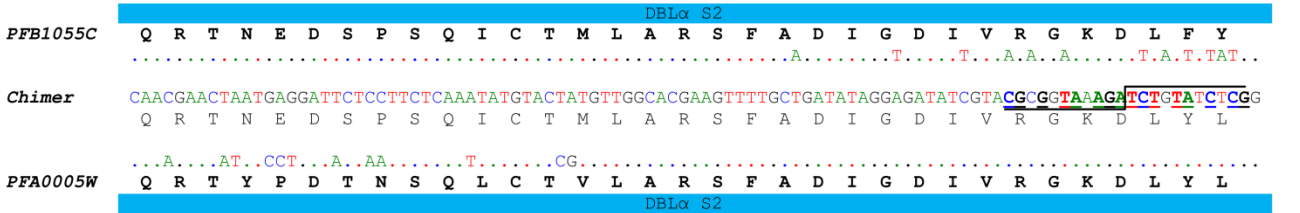

Recombination Sites 3 & 4

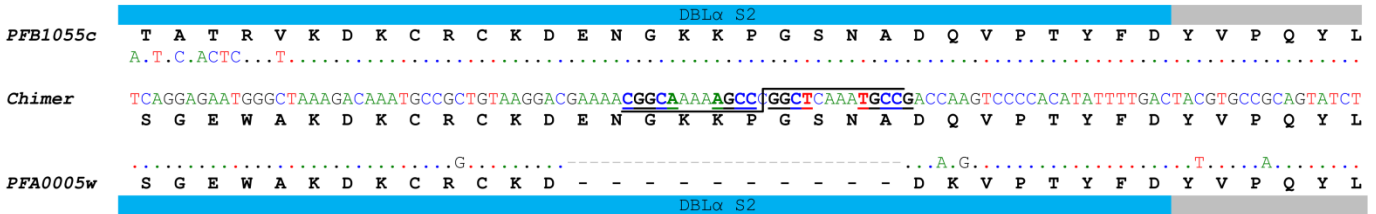



HB2 DBL $\alpha$  S3  
**PFB1055c** R W F E E W A E D F C R K K K K K L E K L E Q Q C R  
 .....GAA..AA...A.G.....G..A.GTTGG..C.AC.G.....C  
**Chimer** TCGCTGGTTCGAGGAATGGGCAGAAGACTTTGTAGATTAAGGAAACATAAATAAAAAGATGCTAAAAACAAATGTCGT  
 R W F E E W A E D F C R L R K H K L K D A K N K C R  
 .....C.....T.....  
**PFA0005w** R W F E E W A E D F C R L R K H K L K D A K N K C R  
 HB2 DBL $\alpha$  S3

Recombination Sites 5

DBL $\delta$  S1 HB4  
**PFB1055c** W K C V S S G E K S V A T A G S S G A T G K S G D K G A I C V P P  
 .....A.....AT..AGTGGTGA AAAAGTGTGTG..C.C..CCGGT.GT.....GTG.....  
**Chimer** TGGAAAGTGTGTCACA-----CCAAGTGGTAACACGAGTGCACCCACTGGCAAAAAGTGGTGATAAGGGTGC CATTTGTGTGCCACCC  
 W K C V T - - - - - P S G N T S D T T G K S G D K G A I C V P P  
 .....T.....C.CCACC.GTGG.A..A.TTGTGTG  
**PFA0005w** W K C V T - - - - - P S G N T S D T T V K S G D T T G G S I C V  
 DBL $\delta$  S1 HB4

RECOMBINATION SITES 6 & 7

inter domain region  
**PFB0010W** I T H H D G E H S S D E D E E E E E E E E E Q Q - - P P A E G T E Q G E E K  
 .....A.....C.GC.-----C.GCCG..G.AA...ACG..ACAGGG.....  
**Chimer** ATCACCACCCACGACGGCGAACA CTCCCTCAGACGAAGCAGAAGAAGAAGAAGAGGAGGAGAAAAGGAAAACGCCGACGCAGGCGGGCAAGATGGCAAGGAGGAGAA  
 I T H H D G E H S S D E D E E E E E E E E E K E N A D A G G E D G K E E K  
 .....A...TG.GG.T...A..CCG.AGAAGAC..A.....  
**PFA0765C** N T E D D D A E E D E E D E E E E E E E E E K E N A D A G G E D G K E E K  
 inter domain region

**PFB0010W** S E S K E  
 .....  
**Chimer** GTCGGAGTCCAGGAG  
 S E S K E  
 .....GAA.....  
**PFA0765C** S E E K E

RECOMBINATION SITE 8

DBL $\gamma$  S1 HB4 S2  
**PFB0010W** I A P S G T T S G K D G A I C V P P R T Q E L C L Y Y L K E L S D  
 .....AC.A.C..A.G..T..G..T..TT.TT..AA...AT.GAGTGAC  
**Chimer** TATCGCACCTAGTGGTACCCTAGTGGAAAAGACGGTGCTATATGTGTGCCACCCAGGAGACGAAAAC TATACATACAGAAACTACCAGACGTGCAATTT  
 I A P S G T T S G K D G A I C V P P R R R R K L Y I Q K L P D V E F  
 C.C.C.....T---.CC.G....C.....  
**PFA0765C** T P P S G T - - - N Q G A I C V P P R R R K L Y I Q K L P D V E F  
 DBL $\delta$  S1 HB4 S2

RECOMBINATION SITE 9

NTS  
**HB3var14** M V T L G G G G G S S G D A E K Y K Y V N D A K H L L D M I G E T  
 .....A..C...GA.GTA.A.GT.TGT.AACGA...T..G..C.T.....TG..T..AG...CT.  
**Chimer** ATGGTGACCTAGGAGGTGGTGGTGGAAAGTAGTGGTGGTGAGGATGATATTGATAAAAACA---AGTGC AAAACTTTTATTTGGATAGCATAGGAAAATAG  
 M V T L G G G G G S S G G E D D I D K T - S A K H L L D S I G K I  
 .....A.A.T.....CTG.....  
**HB3var10** M V T Q S G G G A G S G G E D D I D K T - S A K H L L D S I G K I  
 NTS

RECOMBINATION SITES 10, 11 & 12

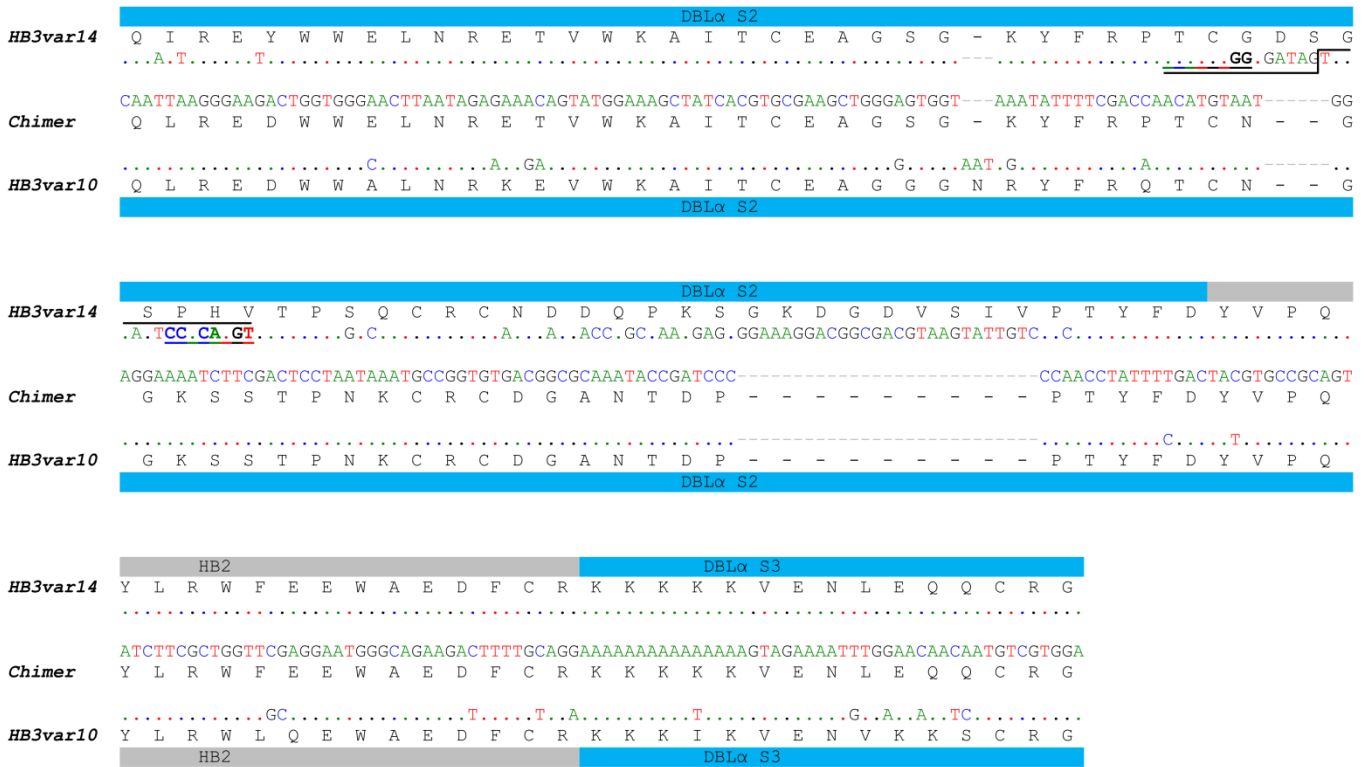

RECOMBINATION SITE 13

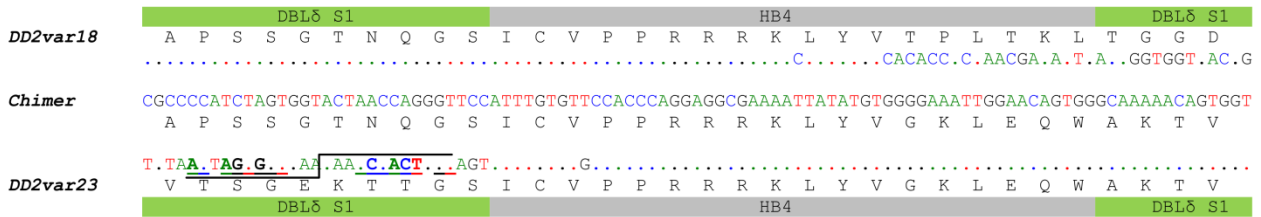

**Supplementary Figure 2 | Alignments of donor and chimer sequence regions containing recombination sites**

**a)** Schematic presentation of Figure 1 showing numbered recombination sites. **b)** Alignments of DNA sequence regions surrounding each of the 13 observed recombination sites with annotated domains of the encoded protein. Dots indicate base pairs identical to the chimeric sequence. Examples of quasi-palindromic sequences are highlighted by bold and under/over-lined formatted nucleotides.

## Supplementary figure 3

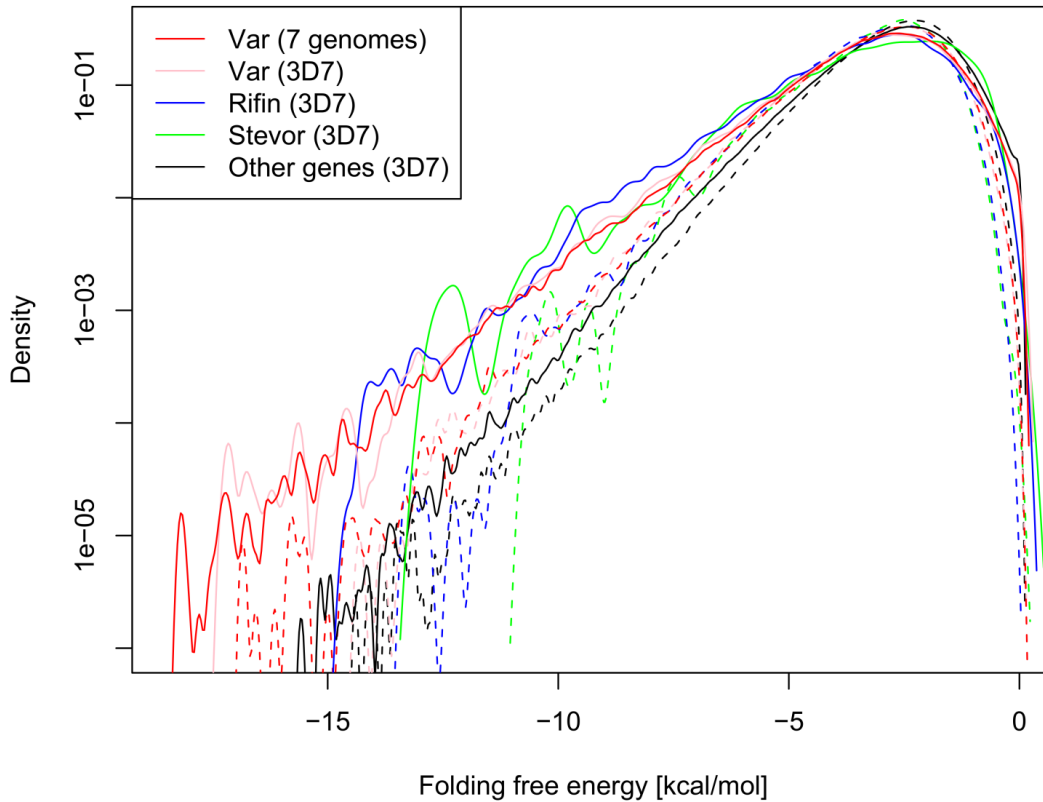

### Supplementary figure 3 | Density distribution of 50-mer DNA folding energies in *P. falciparum* real and shuffled genes

The distribution of 50-mer folding free energies in each of five *P. falciparum* gene groups is plotted with solid lines, while dashed lines show the distribution of 50-mer folding free energies in the same gene groups with each gene sequence randomly shuffled. The folding free energy reflects the probability of a DNA 50-mer to form a DNA secondary structure (DSS); with lower folding free energy 50-mers having higher likelihood of forming DSS. The *var* genes contain the 50-mers with the lowest folding free energies, but all telomeric antigen gene families (*var*, *rif* and *stevor*) contain significantly higher proportions of 50-mers predicted to form DSS (folding free energy cut-off set at  $<-6.27$  kcal/mol) compared to the group of all other *P. falciparum* genes ( $p < 2e-16$  for all comparisons). In *var*, *rif* and *stevor* genes, the proportion of 50-mers with folding free energy  $<-6.27$  kcal/mol is 5.6%, 8.2% and 5.6%, respectively. For comparison the proportion of the group of all other *P. falciparum* genes is 2.1%. In all *P. falciparum* gene groups the folding free energy of 50-mers is lower than would be expected from the nucleotide composition alone.

# Supplementary figure 4

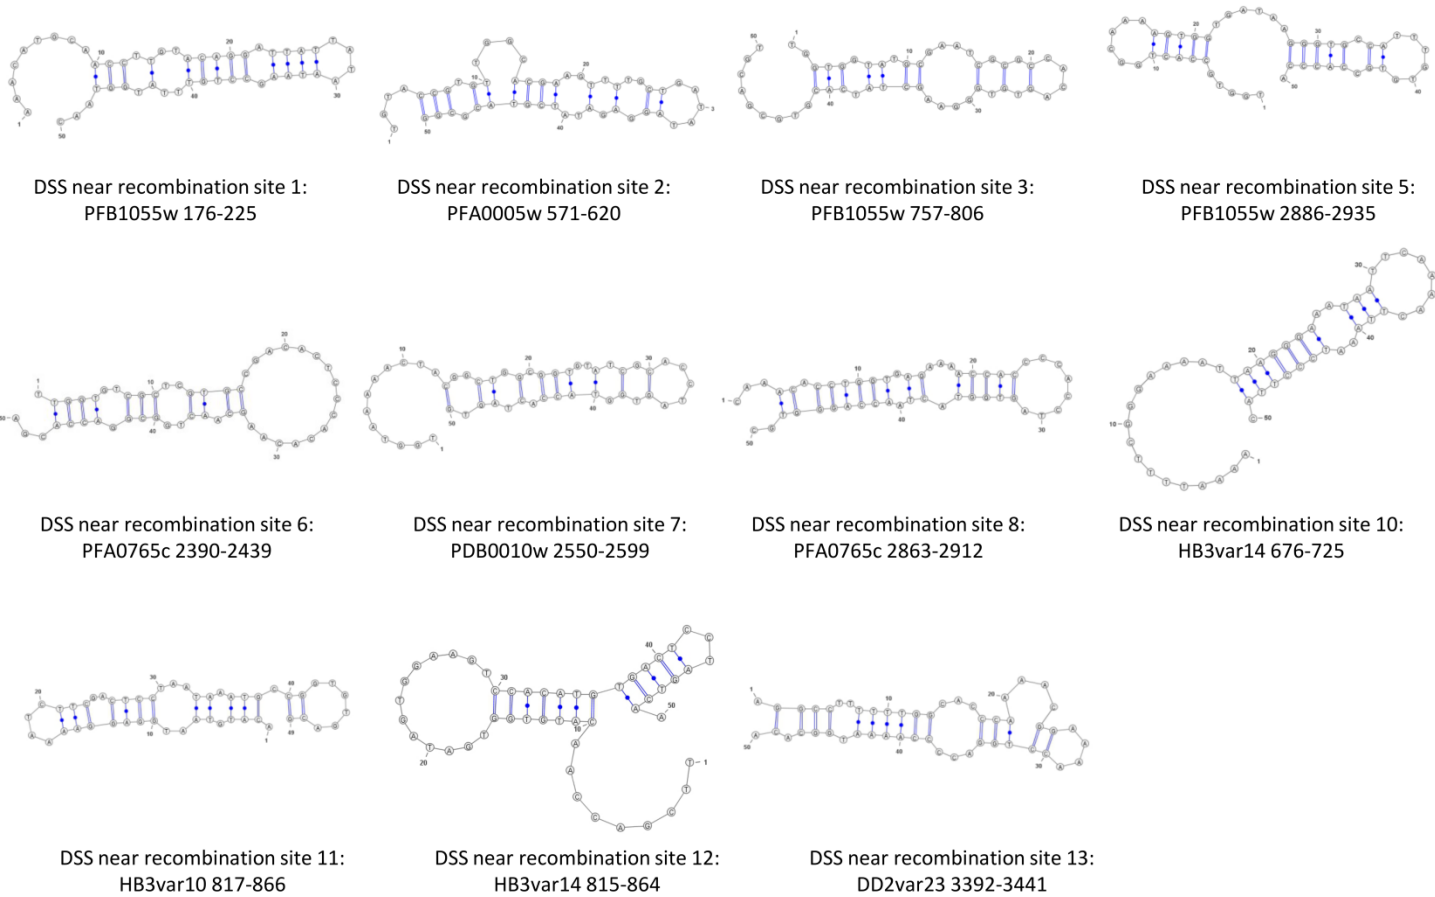

## Supplementary figure 4 | Examples of *var* 50-mer DNA secondary structures

Examples of minimum free energy structures of *var* 50-mers predicted by RNAfold. 50-mers, which are located near recombination sites, and that have a high propensity of forming secondary structures are shown.

# Supplementary figure 5

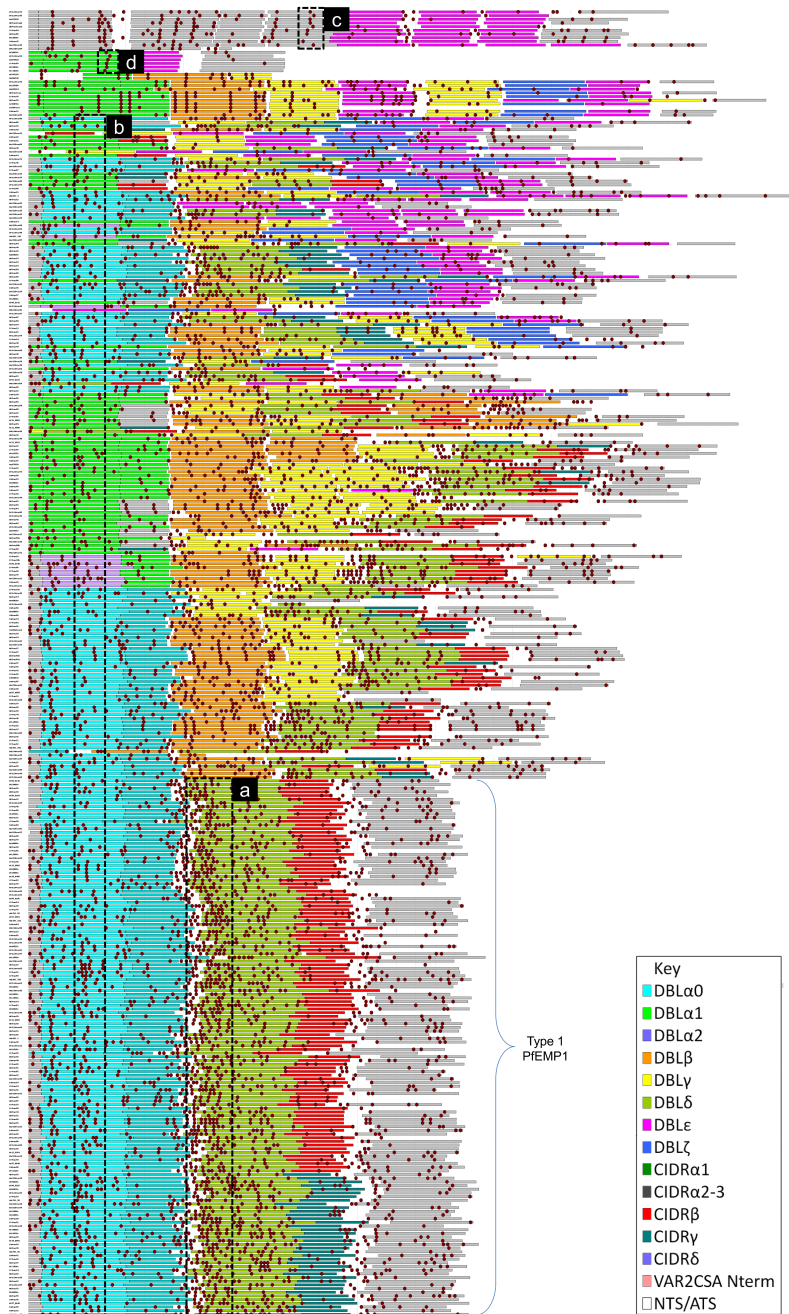

## Supplementary Figure 5 | Location of low folding free energy DNA 50-mers in *P. falciparum* var genes

The DNA 50-mers in var genes with the highest potential to form DNA secondary structures (DSS) (folding free energy  $< -6.27$  kcal/mol) are shown as brown dots superimposed onto of 366 domain annotated PfEMP1 sequences from seven different *P. falciparum* genomes (31) originating from Central America (HB3), Africa (PFCLIN, IT/FCR3) and Asia (RAJ116, IGH, DD2). 3D7 is the Schiphol airport canal isolate. For simplicity, only non-overlapping 50-mers are plotted. PfEMP1 are aligned by composition of phylogenetically distinct DBL and CIDR domain sub-classes flanked by N-terminal (NTS) and C-terminal acidic segments (ATS) (see colour code). Frames indicate previously identified recombination hotspots, which are particularly enriched for DSS. These include hotspots in 'mid var gene inter-domain region' (a) [6,7], the boundary between DBL subdomain 2 and 3 (b) (31), DBL3 of var2csa (c) (47) and (d) the first DBL of var3 (31). Plots using varying folding free energy thresholds yield similar results as those presented here.

# Supplementary data file 1

## Fasta file with chimeric *var* sequences

>X4PFA0765c\_PFB0010w

```
TAGTGGGGGCGATAGTTCACGGGATGAAAGTGTCAAAGATTTATTTGATAGAATAGGGAAGAA
AGTTTACGAAAAACAGAAAAGATTGCAAAACGATATACTACTGAATTGCATGGTGATTTGTC
AAAAGCAACATATCCAAATGATAAACATCCTGAAGGATCAACAGAAAATAATCCATGCAAAC
TCAATATGATTATAACTAATGTTACTCATGGTTTTGGTCAAGAGTATCCTTGTGAAACGGAC
ATAGTAGAACGTTTTTCTGATACAGAAGGAGCACAATGTGATAAGAAAAAATAAAAAGATAAT
AGTGAAGGAGCTTGCCTCCATATAGACGATTACATGTATGCGTTAGAAATTTGGAAAATATCA
ATGATTATAGTAAAATTAATAATAAACATAATTTATTGGTAGAAGTGTGTCTTGCAGCCAAATA
TGAAGGGGAATCAATAACAGGTCGTTATCCACAACATCAAGAACTAATCCTGATACTAAATC
TCAACTATGTACTGTATTAGCACGAAGTTTTGCAGATATAGGTGATATTATAAGAGGAAAAGAT
CTGTATCGTGGTGGTAATACCAAAGAAAAAAGAAAAAATTAGAAGAAAATTTAAA
AACGATTTTCGGGCATATATATGATGAATTGAAGAATGGGAAGACGAATGGGGAGGAGGAGCT
ACAAAAACGCTACCGAGGTGATAAAGATAATGATTTTTATCAATTACGAGAAGATTGGTGGGA
CGCTAATCGAGAAACGGTATGGAAAGCTATCACATGCAACGCTGGAAGTTATCAATATTCTCA
ACCAACATGTGGTCGTGGAGAAATCCATATGTGACGCTTAGTAAATGCCAATGTATTGCTGGA
GAAGTTCCTACATTTTTGACTATGTCCCAATATTTGAGATGGTTCGAGGAATGGGCAGAAG
ACTTTTGTGCTAAAAAATAAATAAATAAATAAATAAATAAATAAATAAATAAATAAATAAATAA
GGGGTAAAGAAAAATATTGTGATCGTGATGGATATAATTGTGATGGTACTATTAGAAAGCAAT
ATATTTATCGTTTGGATACTGATTGTACTAAATGTTCTCTTGCATGTAAGACTTTTGCAGGAAATGG
ATTGATAACCAAAAAGAACAATTTGACAAACAAAAACAAAAATATCAAAATGAAATATCAGGT
GGTGGTGGTAGGAGGCCAAAACGGAGTACACATAGTACTAAAGAGTATGAAGGATATGAAAA
ACATTTTAATGAAGAACTACGAAATGAAGGCAAAGATGTGAGAAGCTTTTTACAATTGTTAAGT
AAAGAAAAATATGTAAAGAAAGAATTCAGTAGGAGAAGAAACAGCAAATTTATGGTAATTT
CGAAAATGAAAGTAATACTTTTTCTCATACGGAATACTGCGATCGTTGTCTTTGTGTGGAGTT
GATTGCAGCAGTGATAACTGTAGAAAAAGCCAGATAAATCATGCGATGAACAAATTAAGTAC
AAAGAATACCCTCCTGAAAATACTACGAAAATCCCAAACCTACCCTGAAAAAGAAAGACA
GGTATACTAAAGAAATATGAAAAGTTTTGTAAAAATAGTGATGGTAATAACGGTGGTCAAATT
AAAAAATGGGAATGTCATTATGAAAAAATGATAAAGATGATGGCAATGGTGACATTAATAAT
TGCATACAAGGAGATTGGAAAACCTCTAAAAACGTATATTACCCTATATCCTATTATTCATTTTT
TTATGGTTTCGATTATTGATATGTTAAACGAATCTATTGAGTGGAGAGAAAGACTTAAGAGTTGT
ATAAATGATGCGAAATTAGGAAAATGTAGAAAAGGATGTAAAAATCCATGTGAATGTTATAAA
CGATGGGTTGAAAAAAGACGAATGGGACAAAATAAAAAGAATTTTTTCGCAAGCAAAA
AGATTTGCTAAAAGACATTGCAGGAATGGATGCTGGCGAACTTCTTGAATTTTATTTGGAAAAT
ATTTTTTTGGAAAGATATGAAAAATGCTAATGGAGATCCAAAAGTAATAGAAAAATTTAAAGAA
ATTTTGGGAAAGGAAAATGAGGAAGTTCAAGATCCTTTAAAAACGAAAAAACAATTGATGAC
TTTCTCGAAAAGGAATTAACGAAGCCAAAAACTGCGTAGAAAAAATCCAGATAACGAATGT
CCAAAACAAAAGCCCCCGCGATGGTGCCGCCCTCCGACCCACCACGTGAAGACATCACC
CACCACGACGGCGAACACTCCTCAGACGAAGACGAAGAAGAAGAAGAAGAGGAGGAGGAAA
AGGAAAACGCCGACGCAGGCGGCGAAGATGGCAAGGAGGAGAAGTCGGAGTCCAAGGAGGTG
GTAGAACAACAAGAGACACCACAAAAAGACACAGAAAAGACGGTACCAACAACAACACCAAC
AGTAGACGTTTGCACACAGTAAAACCGCACTCGCGGACACGGGCAGTCTCAATGCTGCATG
TTCCCTCAAATATGTTACTGGTAAAAACTACGGCTGGCGGTGTATCGCACCTAGTGGTACCACT
AGTGAAAAGACGGTGCTATATGTGTGCCACCCAGGAGACGAAAATATAACATACAGAACTA
CCAGACGTCGAATTTGACGACAAGTCATTACGTAAGTGGTTTATAGAGACGGCAGCTATAGAG
ACTTTTTTCTTATGGGATAGATATAAAAAAATAAAAAGCAAAAGAGAAAAAGAAAAAGAGGAT
GCAAAGGACAAATATATGAATCAGCCGGTGAAGACGACGAAGACAAAGACCCCCAAGAGGA
ATTACAACGTGGAGATATACCTGATGGTTTCTTGCAGCAGATGTTTATACATTAGGAGATTAT
```

AGAGATATATTAGAAGGGAAAAACGATATCCTAATTGGAAAAACAGGTAAGTGGTAGTGCAAAA  
GATGAAATGGCTGATAAAGAAAATAAAATAAAAGAAGCTATAAAAAAGTTTTTTTCAAATGGT  
GATTCCCAACTTCCTAGTGGAAAACCTGGTGATGAACGCAAAAAATTTTGGGAAGCAAATGAA  
AAACATATATGGAATGCTATGGTATGTGCTCTAACCTATGAAGAGAAGACAAGTAGTGCTAGT  
GGTGGAGAAAAAACACAACACTATTACACAGGACGATGGTTTGAAGGTGCACTTATCAAAGAT  
GGCAATCCCAAAAACCCCAATACCATTACGAAAAAGTGACACTCGAAAATAGTGGTCCCAGC  
CCCAAACCCAAACCGGCTCCCCCGGCACTAGTGGTGATAACACCCCCCTCACCAATTTGTGA  
AAATACCTACATTTTTTCGTTGGTTACATGAGTGGGGAAGCGACTTTTGTGGTACGCGGAAGAG  
GATGTTGGATAAAATAATATTTGAATGTCGTGGTAATGGAAAGGTTTGTAGTGGAGATGGGGA  
GGACTGTAAAGATCAGCTTAAACACAATCCTAGTACTGTTCCGGGATTTTTTGTGTCCGACGTGT  
GGCAGACATTGTAGTTTTTATAAAAAATGGATAGACATAAAAAAAAAGGAATTTGAGGAACAA  
TCAAATGCATATACTGGACAAAAAGACAAATGCAAAAAGGATAGTAATAATGGATTTTATAGA  
AACTACAAACATATAATGAAGCTAAAGACTTCTTACAAACGTTAAGACCATGTAAAACCTAAT  
AATGAGAATAATAATGGAGATGATAAATTAGATTTTACAAATCCAAAGGAAACATTTAGACCT  
GCGAAAAATTGTAAACCATGTTCTGAATTTAAAGTTAAATGTGATTATGATAATTGTACTGGTG  
CTAATGCAAATACGTGCACTACACGAAAGATTTCTCCAAAAGATATTGACGAAAAGACAGATC  
CTAATGGAAACATAGAAATGCTTGTGAGTGATGACAGTGCAACGGGATTTGCAGGTGATTTAA  
ACGATGATTGTAAAAATGCACATATTTTTAAAGCTTTTAGAGAAGATGTATGGACATGTGGTAA  
GGTATGTGGTTATAATGTATGTAAACCGGTAAGGTTAATGGGGAAACATTCGATGCAAAAAA  
AAAAGGCGAAAACCAAATTATAATTATTAGGGCATTGTTTAAAATATGGTTAGAATATTTTTTA  
GAAGATTATAATAAAATTAAAAAAAAATTAATCCATGTAGGAATAATGGTGAGGTATCCAAA  
TGTATAAATGATTATGACGAAAAACATAAATGTGTAGAACAAATGGATAGAGAAGAAAAGAGC  
AGAATGGGAAAAAATAAAAAAACATTACAAAAGACAAAATGAAAAGGGTGACACAGAAATGA  
TATCTTTGGTTAGAAATTTTTTGGGTGACGTGCAACCCCAAACCTGAAGTTCACAAAGCTATACA  
ACCTTGTAAGATTTAGATAAGTTTCAAGATTCAGTTATTGTACTGTCAATGGGAGCTCAGCA  
AAAGGTAAAGACGGTACACAAAAAGATATCGTAGAATGTTTGTTCAAAAGCTTGAAGAAAAA  
GCAAAAACGTGTTCCACCTCAACTAGTGAAGAAACCCAAAACACAGCACAGTGTCAAGATACC  
CACCTGATGATGACTTATCCCTTGAAGAAACAGAGGAGGTGAAGGCGCCAAACATTTGTCCA  
AAAGACCCTGAATCAAAAAAAGATGAACCAGATGACTGTTGTGAACAAGCAAAGGCACTACCA  
AAAGAAACAGCGGATGTAGTAGCAGATAATGGTAGTGGAAACGATGAAGTACAAGAGGAAGA  
AGA  
ATCCGAAGAAAAAATAAAGGAGATGCTGCCCCATTACCGGAAAAACCATCAGGTGATTCCAC  
CTCTACCGACCAAACCGAACCCCCAGCACCAGCACCACAACCACTCCCAAGTGATAATACCAG  
CGATATATTA AAAACTACTATCCCGTTTTGGTATTGCTTTGGCCTTGACTTCTATTGC

>X5PFA0005w\_PFB1055c

TGCTGCTGGTAGTAGTGGTGAGGAAGATGCCAAACATGTATTGGATGAATTTGGGCAACAAGT  
GTACAATGAAAAGTGGAAAAGTATGCTAATTCTAAAATATATAAAGAGGCGTTGAAAGGAGA  
TTTGTCAACAAGCATCAATTTTGGAGCGAATTAGCTGGCACCTATAAACCATGTGCCCTTGAATAT  
GAATATTATAAGCATACTAATGGCGGTGGTAAAGGTAAAAGGTATCCGTGTACAGAGTTAGGT  
GAAAAGTAGAACCACGTTTTTCGGATACACTTGGTGGCCAGTGTACTAACAAAAAATAAAA  
GGTAATGAATATAGTACTAAAAGTGGTAAAGATTGTGGAGCATGTGCACCATAACCGACGTCTA  
CATTTATGTAGTCATAATTTGGAATCTATAGACACAACGTCGATGACGCATAAGTTGTTGTTAG  
AGGTGTGTATGGCAGCAAAATACGAAGGAACTCAATAGATACACATTATCCACAACATCAAC  
GAACTAATGAGGATTCTCCTTCTCAAATATGTACTATGTTGGCACGAAGTTTTGCTGATATAGG  
AGATATCGTACGCGGTAAAGATCTGTATCTCGGTAATCCACAAGAAAGTACACAAAGAATAAT  
ATTAGAAAATAATTTGAAAGATATTTTCGCGAAAATACATAGTGACGTGATGTCAACGAGCGG  
GAGTAATGGGAGGGCGCTACAAAAACGCTACAAAGATACTGATAATTATTATGAATTGAGAGA  
AGATTGGTGGGCACTTAATAGAGACCAAGTATGGAAAGCTATCACATGCAATGCTGGGGGTGG  
TAATAGATATTTTCGACAAACATGTGGTTCAGGAGAATGGGCTAAAGACAAATGCCGCTGTAA  
GGACGAAAACGGCAAAAAGCCCGGCTCAAATGCCGACCAAGTCCCACATATTTGACTACGT  
GCCGACGTATCTTCGCTGGTTCGAGGAATGGGCAGAAGACTTTTGTAGATTAAGGAAACATAA  
ATTA AAAAGATGCTAAAAACAATGTCGTGGAGATAGTGGTAACGATAGATATTGTGATCTTAA

TAGGTATGATTGCACACAACTATTAGAGGAAATGAACATTTTGTGAAAAGGATGATTGTAA  
AGGTTGTCAGTATTCGTGCGCTCATTTTGTGAACTGGATAGATAACCAAAAAGTAAATTTGAA  
AAACAAAAGAAAAATATACAAAAGAAATTAATAAAAAGCATCCAACAACCATAATAATAAA  
AACTGCAAATCGAAAAACAACATTAATAACTTATATGTAAAAGAATTTTATAAAAACTTCAA  
GAGAAATATGGAGATGTCGAAAATTTTTACAAAATTAATGAAGAACAATATGCAAAAAT  
CAACCGTACAATGATGAAAGTAGTATTGATATTAATTTCAAAGTATTAAGATATTGACATAT  
TTTCTCATACGGAATACTGTCAAGCATGTCCATGGTGCGGGGCCAAACGTAAAGGTAAAGGAT  
GGGAACCTAAAGAAAAACCTGTGGAAAAACAAGACATACGATCCTAAGAAAAACAACGAAT  
ATACCAATACTTACCCCTTATATATCACAGCAAAGTATACTAAAAAATATAATAAATTTTGT  
ATGGTAATGGTGGAAATGGTGCACCTGCTACTGCAACTGGTGGTGGTCAAATTAATAAATTTGGC  
AATGTCATTATGAAGGTGATAATAATGATAATTGTGTAGAAAGGAGAATGGAAAGAGTTTAAAG  
AGGGTAAAAACGTTATGTCCTATAATGCTTTTTTTTTGGAAGTGGGTTCATGATATGTTAATCGAC  
TCTATGCAATGGAGAAATGAACATGGAAATTGTATAAATAAAGATAATGACAACACATGTAAA  
AATTCATGCAAAAAGACCATGTGAATGTTTTAAAAGATGGGTAGATCAAAAAAAAAAAAAACGAA  
TGGGAGGCAATAAAAAGACCATTTTAAAAGCAAATATTGCAGCTGAAACACAATGTGATCCT  
GGCGTAACTCTTCAATGGGTTTTGATATTAGACTTTTTGAAAGACGAATCCACAGAAGATAAGG  
AAAATAAGGTGAGTGCAGAGGAGGCAAAGGAAATAAAACACCTTCGCCAAATGTTGCAACAA  
GCAGGCGTTGATGATCCTGCTGCTTTTTGCTCGTCCGTGTACTGAAGATGGTGTGCTGAACAGG  
ACACTATAATGGATAAATTGCTCAATCGCGAAGAAAACGATGCCACTGAATGCAAAAAATGCG  
ACAAACCACCACCAGCACCCACTGCAGGAGATCGTGGCCCTGGAGCCCAGCGCCGACCCCCACG  
ACGTCCAACAGCCACGACCTCCTGGTAGTGGCCCCGGCACGGACGCAACGACGAAGACGATG  
ATGACGATGATGACGATGATGACGAAGAAGACGGTGAAGCCAAAGAAGAAGAAGAAGACGAG  
GAAAAACAAGAGGACGTCCACCAGGAGGAAAAGGCAAAGAAGGAAGAACCACAAAAAGAGG  
AGGTGGCACGAACACCAAAAAGACGATGTAATGTGTGCAATATAGTGAACAATGTGTTTACAG  
ACGGCAGTAGTCTCCAAGCAGCGTGCTCTCTCAAATATGGCAAAAACGCACCCACAAGTTGGA  
AGTGTGTCACACCAAGTGGTAACACGAGTGACACCACTGGCAAAAAGTGGTGATAAGGGTGCCA  
TTTGTGTGCCACCCAGGAGGCGACGACTATACGTGGGTGGGTTAACCAAGTTGACAAGTGCTG  
GCACGTCTAGTGAGTCACCACAGGGGGGTAGTGAGTCATCACGGGCGAGTGATGTGTCAACAG  
GTAACGGCGGCGACGACATCACCACCACCGAGTCATTACGTAAGTGGTTTATAGAGACGGCAG  
CTATAGAGACTTTTTTCTTATGGCATAGATATAAAAAAGAGTGGGAGGCACAAAAGAAGGCGG  
AACTACAACGAAATGGATTACTACTCGGCACAGGTGCTAGCCTCAACCTTGGTGGTGTGACTC  
CAACCCCCAACACAATTACAAAAAGTGGTACCATACCCCTCGATTTCTTGAGATTAATGTTT  
TATACTTTAGGTGATTATAGAGATATTTTGGTACGAGGTGTTGCTGACGACAAAACGGTGGCA  
ACAACATAATACTTAATGCGAGTGGTAACAAGGATGAAAAACAGAAAATGGAGAAAATACAA  
GAGAAAATAGAACAAATTCTTCCAAGTGGTAACAAGAAACTCGTGGCCCCCAAAATAGT  
GTCAATGACCGTCAATCCTTGTGGGATAGAATCGCCGAACATGTTTGGCATGGAATGGTTTGC  
CATTAACATATAAAGATGACGACAATGGCCTCAAAGGCGTCGTAAAAAACCACAAAAGATTG  
AAAATCCGGAGAACTTTGGAACGAAACAACCAAAAAACCCAAAGACGAGAAATACCAATAC  
CAAATGCCAAACTCGAAGATGAAAGTGGCGAAAAACGACCAGACTCCTCAGCCAGTGGTACG  
AAATTAACCGACTTCATCAAACGCCCCCTTATTTCCGTTACCTTGAAGAATGGGGTCAAATTT  
TTTGTAAAAAACGAACAGAGATGTTGGGGAAGATAAAGGAGGAT  
TGCTACAAAATGGTGGACGTTGTAGTGGTGTGTTGAAATGTAACGAAATAGTTATAGATA  
AGGAAAAAATTTTTGGCGATTTACTTTGTCCGACGTGTGCCAGACATTGTAGATTTTATAAAAA  
GTGGATAAACACAAAAGGGACGAATTTAATAAACAATCAAATGCATATTCTGAACAAAAAAA  
AAAATACGAAGAGGAAAATGATAGTGCTCAAAGAATAATGGAGTTTGCAGAACACTAAAAG  
ATGACGCTGCAGAAATTTTAAATAGGTAAAAAACGGACCATGTAATAATGAGAGTGAAGAGA  
ATAAAAAAGCAGAGGATGAAATAGATTTTAAAGAAACCAGATGATACATTTAAAGATGCAGATA  
ATTGTAACCATGTTCTGAATTTAAAATTAATGTGAAAATCATAATTGCAGCAGTGGTGGTAA  
TACACAAGGGAAGTGCAGTGGAAAAACGACTATTGCTGCAACAGAAATTGAAAATATAAAAAAC  
AAATACTAAAGAAGTTACTATGCTTGTGAGTGATGACAGTAAAAGTGCAACGGAATTTAAGGA  
TGGTTTAAAGCGAATGTAAAGATAAAGGTATATTTAAAGGTATTAGAAAAGATGAATGGGAATG  
TGGCAAAGTATGTGGTGTAGATATATGTAATCTGAAAAAAAAAAGATAACATTGGGAAAGAAGC  
GATAAAAAATATATCATAATGAAAGAATTGCTTAAACGATGGTTAGAATATTTTTAGAAAGATT



ATAATAAAATTAACATAAAATTTACATTGTACGAAAAATGGTAAAGGATCCAAATGTATAA  
AAGGTTGCGTAGATAAATGGGTACAACAGAAAAAGGAAGAATGGAAACAAATAAAAGAACGT  
TTCAATGAACAATAAAAAGTAAAACCTCAGATGAATATTTTAAACGTTAAAAGTTTTTTGGAGA  
CCTGGATACCTAAAATTGCTGTTGTAATGATCAAGATAATGTTATAAAATTAAGTAAGTTCGG  
TAATTCCTGTGGATGTAGTGCCAGTGCGATCTCAACAAATGGTAATGAGGAGGATGCTATAGAT  
TGTATGATTAAAAAGCTTGAAAAAAAATTGACGAATGCAAAAGGAAACCTGGCGAAAAATAGT  
GGTCAAACATGTAACGAAACACTAACACATCCCCTTGACGTTTCAGGATGAAGATGAACCCCTT  
GAAGAAACAGAAGAAAACCCAGTGGGAAAACAACACCCATCATTGTCCGCCAGTGGAAGAT  
AAAAAAAAGAGGAAGAAGGAGAACTTGTACACCGGCATCACCAGCACCAGCACCAGCACC  
AGCACCAGCATCTCCATCCCCGACACCGGCCCTGCGGATGAACCGTTTGACCCAATACTATA  
CAAACAACCATTCCTTTAGGTATTGCGCTGGCATTAGGATCCATTGCTTTTTTATTTTTGAAGGT  
AATATATATATGTGTGGTATATATGTATATATATATGTGTTTCTGTATATATATGTATGTGTGG  
TGTGTTTGGATATATATATATGTGTATGTATAAGTGTTTGTGTATATGTATGTGATTTATATATA  
TTTTATATA

>X96DD2var18\_DD2var23

TGCTGGTAGTAGTGGTGAGGAAGATAAAGATGCCAAAAATATGTTTGTAGGATAGGGAAAAT  
AGTGCATGACAAAGTAAAAGAGGAAGCTAAAAAATATATTGAAAAATTGAAAGGAGATTTGA  
AGAAAGCAACAAATCGTAGTGGGAAACAGCATAACCCCTTGATCCGTGCATGTTTGATTATA  
CTACACATTTTGATGCTAACAGTGAACGGCATCCGTGCAAAAA  
TTTAAAAGGAATTACAAATGAAGAACGTTTTTTCGGATACACTTGGTGGCCAGTGTACTAAGGAA  
AAAATAAGTGGTAGTACAAATACATGTGGTGCTTGTGCTCCATACCGACGCTTACATTTATGTA  
ATCATAATTTGGAAACCATAAACAATACAACGTCGATGACGCATAAGTTGTTGGCAGAAGTGT  
GTTATGTAGCAAAAGAGGAAGGGGCATCAATAACACGAGATTATCCAAAATATCAAACAACAT  
ATGAGGGTTCTGGTTTTACATTGTGTACTATGCTGGCACGAAGTTTTGCAGATATAGGAGACAT  
CGTACGCGGTAAAGATCTTTTCCTCGGTAATGATAAAGAAAAAGAAAAAAGAAAAACAATTAGA  
TGATAAGTTGAAAGATATTTCAAGCAAATACATAAGGAAGTGACGAAGACGAATAGCGCGTT  
ACAAGCTCGCTACGAAGGTGATAAAGAAAATTTTTATCAATTACGAGAAGATTGGTGGGATGC  
GAATCGCGCCACAGTATGGAAAGCCATCACATGTAAGGCGGACACTGGTAATGCATACTTTTCG  
ACCAACGTGCAGTGATGGAAAGAGTCAGTCTCAAGCTAAAAACAAATGCACGTGTAACAATGG  
TGATGTCCCCACATATTTTGACTATGTGCCGAGTTTCTTCGCTGGTTCGAAGAATGGGCAGAA  
GACTTTTGTGCGATTAAGGAAACATAAATTAAGATGCTAAAGAACAATGTCGTAACCAAAT  
GGTGAAGATAAATATTGTGATCTTAATAGGTATGATTGTGAAAAAACAGCTAGCGGAAAACAT  
GATTTTTTTGAAGAGGATGTTTGTAAAGATTGTCAGTATTCGTGCGCTCGTTTTGTAAAATGGAT  
AGATAACCAAAAAAAGAATTTGAAAAACAAGAAAAAAAATATACAAAAGAAATAAAAAAAG  
ATCATGGTACAACATTACAAGTTGAAAAACAACACTATTAATAACTTATATGTAGATGATTTTTTA  
TAAAATACTGAAAAAATATTATCCAACAGTTGATAAATTTTTAGAAAAATTAAGTAAAGAAAA  
AATATGCGAAAAGCAGCCTGAAGTGAAGGAAAAGGAAAGTCTATCGATTTCAATGATGAACC  
TGACGACATATTTTCTCGTACAAAATATTGTCGTGCATGTCCTTTGTGTGGAGTAAATGGCCCA  
AAGGAAAATGGAAAGATATAGATGATGGAGTATGTGCAAATTTAAATAAAAAAAGAATTAC  
AAAGAAGATAATATTACCGATATAACCAGTACTTACCCTGAAAAAGGAAAGACAGGTATACTA  
AAAAAATATGAAACGTTTTTGTGCAACTGGTGTGGTCAAATTAAAAAATGGGAATGTTATTATG  
ATGAAGATAAGCCTAGTGGTCAAATAATAATTGCACTAGGAAAATGGGAAAGTTTTTACAG  
GGGAAGAAGACGTTATGTCCTATAATGCATTTTTTTGGAAGTGGGTTTCAGAAATGTTGGACGA  
TTCTATAAAATGGAGGGCAGAACTTGATAAATGCTTAAAAAATGATAAGAAAACATGTGGAAA  
AAAAAATGTAATAGAGACTGTAATGTTATAAAAAATGGGTTAAAAAAAAGAAACCGAAT  
GGGAAGAAATAGAAAAACATTTTCGCAAGCAAAAAGATATGGAAAATGAAGGATTGAACTTTG  
AAATGGCACTTAAATTTCTTTTAAATGATGTTTTTTTTGCAAGATATGATAGATGCTAATGGAGA  
TCCACAACAAATAGCGAAAATTAAGAAGTGAAGGAAAAGAAAAACGACGAACGTGAGGATT  
ATTCCAAAGCGAAAACATAATTGATTTGTTGATCGATGAAGAAGAACAAGACGCCGATNNNA  
ATGTGTAACAAATAATCCAGATAACGAATGCAACAAGCACCAACAGATGGAGAAAGTCCCTT  
GCGTTCGACACTCCACACCATCATCACCTGCCCCCTTCCCCCCCCAAAAAAGAGGATTCC  
GACTCCGAAGAAGAGGAGGAAGAAGAAGGTTGAAGGTGAGGATCACACCGCAGAAGACAC

CAAGGTGAACGGGGAGGTGGCACAACCAGAACCAACAACAGATAAGACTACACCACTGGACG  
TTTGCAACATAGTGGAAACACTATTTACTACACCGAAAAGCCTCGATGAAGCCTGCAACCAAA  
AATATAGCGAACCCAACAGATATTGGGGGTGGAAATGTATACCAACTAGTGGTGGTAGTGGTG  
AAGCCAAAAGTCGTCACAAACGTGATCTCGCCCCATCTAGTGGTACTAACCAGGGTTCCATTTG  
TGTTCCACCCAGGAGGCGAAAATTATATGTGGGGAAATTGGAACAGTGGGCAAAAACAGTGGT  
AGAACCACGGCCGGGTGAGACAACACAGGTTTCCACTTCGGCGGGAACCTTCGTCGCCGTCCAA  
CTCACGCGACGTGACTTGCGCAACGCCTTCGTGGAATCGGCCGCGGTTGAGACGTTTTTCTTA  
TGGGATAGATATAAAAAAGAGTGGTTGGCACAAGAAGGCGGAACAAGCACGACAAAATGG  
AGAACTCCTCTTTCTCAACGGCGGATCACCACAACCACCCGGTTCAGGCAGTGTGACAATAAC  
CCCCAAAAGAAATTACAAGAAAGTGGTGAATCCCCCGATTTTTTTGAGATTAATGTTTTATA  
CTTTAGGAGATTATAGGGATATATTATACAGTGGTGATAAGGAAAATGGTAGTAAGTACATGTT  
GGTTGAGGATATTA AAAATATATCTGAGAAAATTAAGAGTATTTTGAACAATGAAAATGACGC  
CAAAACAACAGCACAACAATGGTGGGATAAAAATGCAAAACATATTTGGAAAGGGATGATTTG  
TGCTTTAACCTATGAAGAAAGTGGAGCAATAGGCCGAA  
AACCAACAGAAGATCCCCTGTGAAAGAGGCCTTTTTTGGCACCCAAAACGGAAAACCTGGAC  
CCCAAAATGGCACAGCCGCAACCCCAACCGGCACATACGAAAAAACCTACAAATACGATAAAG  
TGGAACCTTAAGAACA AAAATGGTACGGAAGCCAAACCTATCATCGCCTCAGCCTCTAGTGATA  
CCCCACCATCAACAACCCCAAAATTGACAGAATTTGTGGTAAGACCCCTACTTCCGTTACCT  
TGAAGAATGGGGAGAAACATTTTGTGACAAAGGACACGTATGTTGAAAGATGTGAAGGATAA  
TTGTGTAATAGTGACAATCCAGGTCACCATTATTGTAGTGGGGATGGGCATGATTGTACTGAT  
AAAAATCATAGACATAGGAATATGTTTGCAAATTTAGATTGTCGTCCTTGTTATGAACAATGTA  
GAAAATATAGAAAATGGATAGATATGAAATTCGTAGAATATCATAAGCAAGAAAAGAAATATA  
AAGATGAATATGGAAAATTAACAGAACGTAATTGTAGTGGTAGTGGTGATGATAATAATTGTT  
GTGAACAAATAAAAAAACATTCTACTGCTGCAGATTTTTTGAATCATTGAAACATTGCAAACC  
TGGCGACGATGATGGTGATACAGATAATAAACTAGATTTTTGAGGAACCTCTCAAACGTTTGGC  
CCTTTAGAATATTGTAAAACATGTCCTCCAATAAAGTTAATTGTCGTACACGTGGTAGAACTG  
ATACAAAACCATGTACACCAGATAATGGAAATAAGTGGCAAAGTGTTTTTGATAAAAATACGTA  
AAAACAATGAAAATAGTACTACTATTAATGTAGAAATGGTTGATCGTAGGGGAATTAATATTG  
ATAAGAAATTTGAACAATTGTTTAAAGAATCATATCTTTTAAAAGTGTAAAGAGAACAAAAC  
GGAATGTAAAGTTATTAATAATGATACGGATGTGTGTCACCTTACTAATTTTAAATGACAAAATA  
GACCTTAATGACTATACTACATTTAAAGTATTTCTAGAATATTGGTTAGAAGATTTTTTATATGG  
TTATTATTTATTGAAAAAAAATCGATCTATGTACACAAAAGAAGGAAAGACATGTGAGGA  
AGATTCTAAAATGATTGTGCATGTGTGAAAAAATGGGTAGAACAAAAGAGTACCCAGTGGGG  
AAAATACAAGAACATTTTCAGAAACAAAAAATGCTAATGGTGATGATATTAAGTCTAAAGT  
TAAATTTTTTTCCAGCAGGAACCGTTTGAAGTGATCTCAAAAAGCTAAAGGAAATTTTGAA  
AGTTTAGAGGAGTTAGAGACGTCACTTAAATGTAATGACACTGATTCCTCACAAAAGGATATCA  
TAGAATGTATTCTTAAAGATCTTCAGAAAAAATTGACGATTGTAATCCCAACCTGGCCAAA  
ACAACAACCTGTGTTGACAACCCCTCCCCTAGTGGTGA AAAATTCCATCCTTGACGACGAAAAC  
CTTGACCAAACAACGATAGAAATTCCTGGGGTTTGTAAATACAGTGGAAAGAGCCGGAAGAGACG  
ACGAAGGATAAGAAGGAACCAAAAAGGAACAGGTACCGGAACCTTCACCAAAAAGAAAGA  
TACAATTACATGTAAGACTAATAAATTTAAAAGTACTGAACCTAAAATACCTATGAATTGTGTA  
GAAAAAATAGCAAAGGAATTACAAGAGAATTTTGA AAAATGATATGGATTGTATATTGAAACAA  
AATATAACACCTATTGATTGTACAAATGAGAGTAAACAATCTTCTCCTGGTAATATTAGTTGCG  
ACCTGAAAATACCTTTATTGTGCAATAAATTATGCATACACAAGAAACCCATGTGATAATAAAGG  
AAAAAATCAGTTTAAATGTGACAGGGAATGGAAATGTTATAAAATTTTTAGGCGTCATCGGGA  
AAATAAAGGAGTATGTGTACCTCCTAGAAGAGAAATTATGTGCACAAAAGCACTAGAATATAT  
GAGAACATCAAATTATTCTAATACTGAAAAATTGTTAAATATAGTATTACTTACAGCAGCATAT  
GAAGGAAAAAATTTAAAAGAACAATGGGAAAAAATAAAAAGATCGGAAAATAAAAAGGTACGA  
ATTATGTGATGCTATGAAATACAGTTTTGCTGATTTAGGTGATATTATAAGAGGAAGAGATAAA  
TATACAGACATTAGATATACTGGTAGAAATAGTAAAAAATTTGAGGAAAATTTAAAAAAGTT  
TTTGAAAATATACAAAAAACAATAACATATTTCAAAAAGAGTATCCCAATCTGAAAACATTT  
GTTCTGCCTGGTGGGATGCTAATAGAGAATATGTTTGGAAAGCAATGACTTGTCTGCACCAGA  
AAATTTCTATTTTGTAAAGAGAGGAAAAGGTGATGGAAGTGATTTCAAGTTTTAACATTTTCA



ACAATTGATAAATTACTAAAACATGAAGGAGAAGAAGCCGGTGAATGCCTAAAAACACACAA  
AGAAAAATGCGAAAAAAAAGCAAAACCAGAAAGTGTCGCCCCGCTCCGAAGACAACCAACCAG  
CACTACCTGACCCACCGTCAACCCAGACGAAAACGCCGACGACGACGCCGAAGAAGACGAA  
GAAGAAGATGGCAACGAAGTCGAGGAGGACGAACCACACACGCAAGAAACGGAACAGGCAAC  
AAAAGATGAGGTGACACCAGAACCAAAAGTGGAAGTAAATCCATGTGAAATAGTAAAGACAC  
TATTTAGTAGCGTGGAAAATCTCACAAAGGCATGTGAACAAAAATATGGTTACCCACAACGAC  
ATTGGGGGTGGAAATGTATAAGTGACAAAACAGCCACACGTGGTGGTGTACAGCCATAGGTG  
GTGGTGCCGATCCCGCCAAAGCTAGTGGTACTAACCAGGGTCCATTTGTGTGCCACCCAGGAG  
GCGAAAACCTATACGTGGGGAAATTACAGGAGTGGGCC
